# Supplementary material for: The triglyceride synthesis enzymes DGAT1 and DGAT2 have distinct and overlapping functions in adipocytes
Source: PubMed Central journal article supplement (PMC6547635; doi:10.1194/jlr.m093112), 2019-04-01
Supplement: 10.1194_M093112_jlr.M093112-1.pdf [file 10.1194_M093112_jlr.M093112-1.pdf]

A

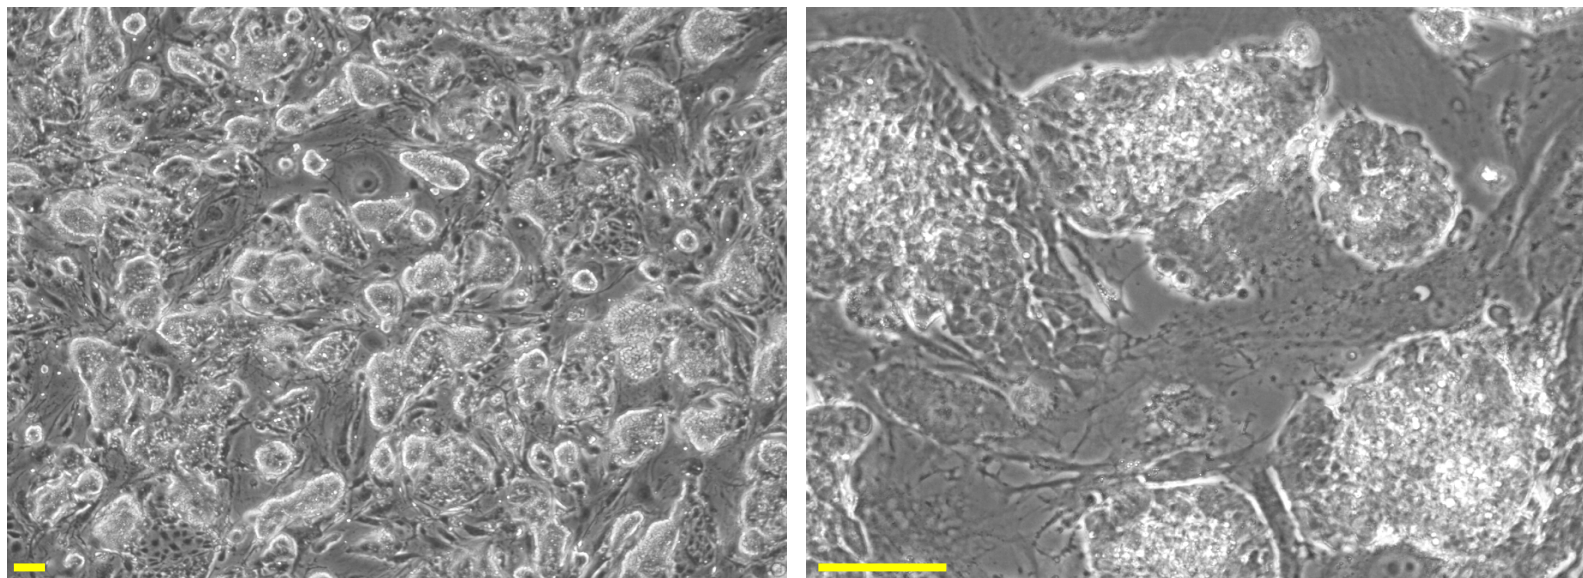

two different magnifications

B

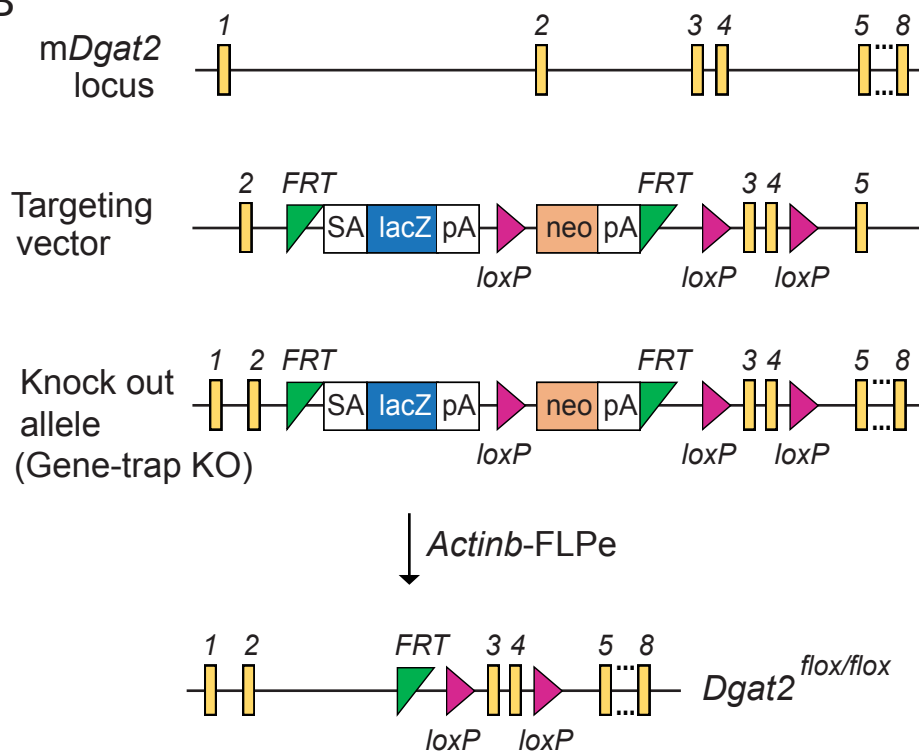

C

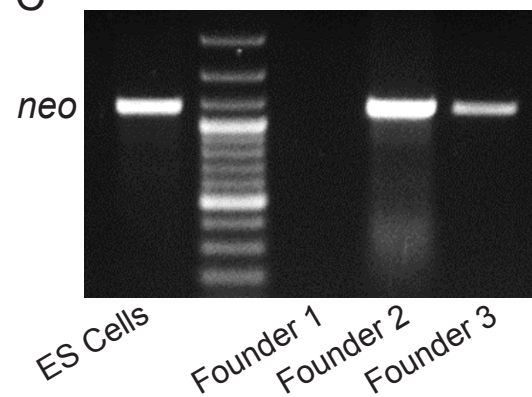

D

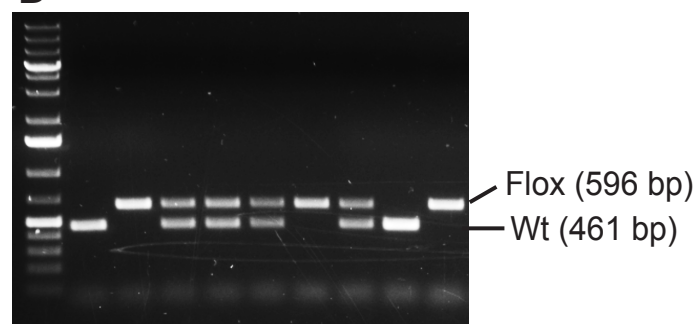

**Fig. S1.** Validation of founders for gene-trap allele, and DGAT2 flox mice by PCR. (A) Targeted ES-cells used for blastocyst injection. (B) Strategy for generating *Dgat2* gene-trap knockout mice, and DGAT2 flox mice. (C) Genotyping of founders for gene-trap allele. (D) Genotyping of DGAT2 flox mice.
