# Supplementary material for: The triglyceride synthesis enzymes DGAT1 and DGAT2 have distinct and overlapping functions in adipocytes
Source: PubMed Central journal article supplement (PMC6547635; doi:10.1194/jlr.m093112), 2019-04-01
Supplement: 10.1194_M093112_jlr.M093112-2.pdf [file 10.1194_M093112_jlr.M093112-2.pdf]

Supplemental Figure S2

**A** Second experiment showing ADGAT1 KO mice are resistant to HFD induced weight gain

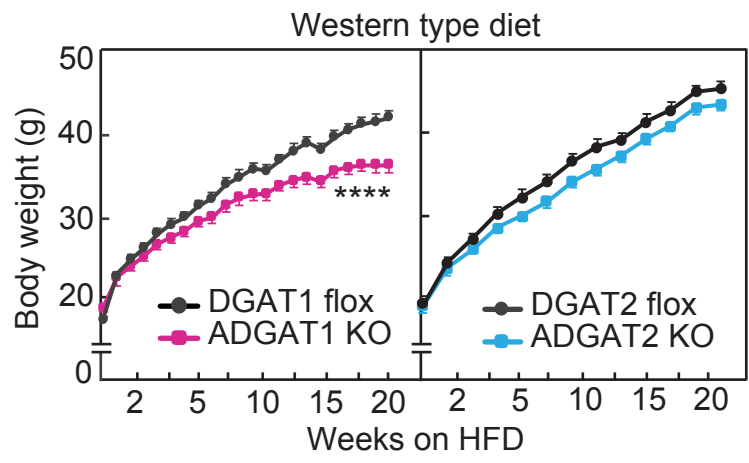

**B** Third experiment showing ADGAT1 KO mice are resistant to HFD induced weight gain

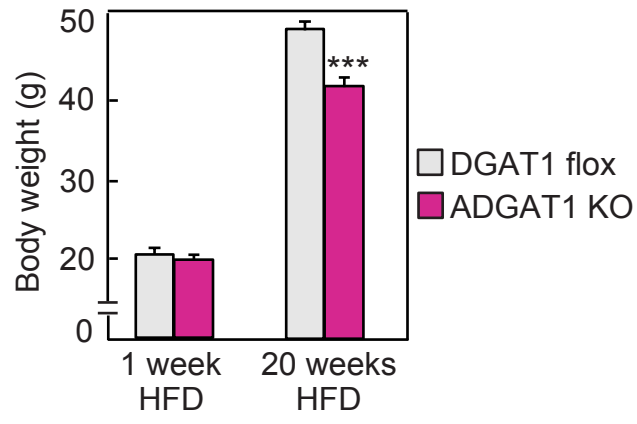

**C** Food intake

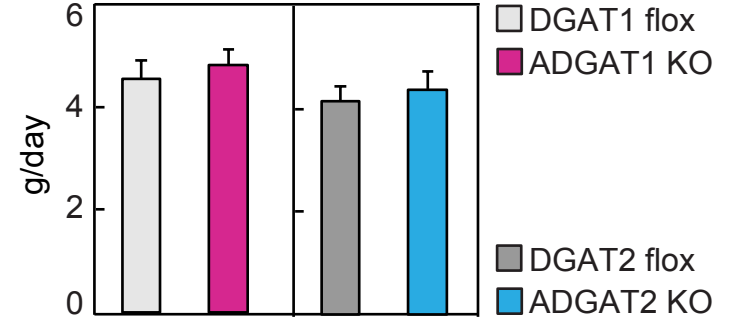

**Fig. S2.** ADGAT1 KO mice are resistant to HFD induced weight gain. (A) Body weights of HFD-fed mice (n=12 for ADGAT1 KO, n=20 for ADGAT2 KO). (B) Body weights of HFD-fed mice (n=12). (C) Daily food intake (n=4 mice per genotype). Data are presented as mean ± SD (C), as mean ± SEM (A and B). \*\*\*p<0.001 by t-test; \*\*\*\*p<0.001 by two-way ANOVA.
